# Supplementary material for: Beyond Traditional Assessments of Cognitive Status: Exploring the Potential of Spatial Navigation Tasks
Source: bioRxiv or medRxiv preprint supplement (doi:10.1101/2024.10.12.24315402), 2025-12-16
Supplement: Supplementary file [file media-1.pdf]

**Table S1.** Normative data for age group by gender.

| Variable                  | Age                     | Gender  | Mean    | SD     | 10th Percentile | 25th Percentile | 50th Percentile | 75th Percentile | 90th Percentile |        |
|---------------------------|-------------------------|---------|---------|--------|-----------------|-----------------|-----------------|-----------------|-----------------|--------|
| <b>Visuospatial</b>       | 21-29                   | Male    | 223.02  | 27.62  | 258.38          | 233.29          | 221.79          | 204.86          | 187.97          |        |
|                           |                         | Female  | 231.40  | 23.43  | 260.22          | 248.50          | 227.61          | 217.80          | 205.24          |        |
|                           |                         | Overall | 227.43  | 25.68  | 260.41          | 244.32          | 224.97          | 213.39          | 195.35          |        |
|                           | 30-39                   | Male    | 238.43  | 26.80  | 264.41          | 248.79          | 236.15          | 222.92          | 208.60          |        |
|                           |                         | Female  | 234.95  | 22.57  | 262.23          | 251.82          | 238.05          | 217.90          | 209.28          |        |
|                           |                         | Overall | 236.49  | 24.42  | 264.13          | 250.18          | 236.16          | 218.43          | 208.24          |        |
|                           | 40-49                   | Male    | 237.26  | 32.37  | 282.28          | 260.95          | 234.60          | 220.85          | 195.07          |        |
|                           |                         | Female  | 245.22  | 30.73  | 285.53          | 266.80          | 245.22          | 223.64          | 210.26          |        |
|                           |                         | Overall | 241.24  | 31.48  | 286.21          | 261.84          | 242.96          | 222.35          | 203.86          |        |
|                           | 50-59                   | Male    | 251.09  | 28.54  | 291.71          | 266.98          | 241.57          | 231.31          | 221.58          |        |
|                           |                         | Female  | 265.12  | 37.96  | 311.72          | 297.24          | 265.99          | 227.87          | 220.60          |        |
|                           |                         | Overall | 260.15  | 35.26  | 308.13          | 288.98          | 260.64          | 228.42          | 220.05          |        |
|                           | 60+                     | Male    | 267.69  | 42.73  | 328.28          | 291.21          | 269.86          | 250.39          | 230.12          |        |
|                           |                         | Female  | 255.52  | 48.45  | 321.88          | 291.14          | 248.96          | 233.96          | 218.58          |        |
|                           |                         | Overall | 260.20  | 46.43  | 324.45          | 291.53          | 258.38          | 239.79          | 220.07          |        |
|                           | <b>Path integration</b> | 21-29   | Male    | 189.62 | 67.10           | 267.45          | 226.77          | 182.89          | 152.43          | 96.06  |
|                           |                         |         | Female  | 195.27 | 62.38           | 267.63          | 230.67          | 199.66          | 154.22          | 119.15 |
|                           |                         |         | Overall | 192.59 | 64.30           | 268.19          | 227.29          | 192.08          | 153.20          | 109.94 |
| 30-39                     |                         | Male    | 243.00  | 157.78 | 334.77          | 259.99          | 210.73          | 130.93          | 110.41          |        |
|                           |                         | Female  | 211.94  | 70.19  | 299.35          | 263.91          | 216.40          | 155.71          | 122.57          |        |
|                           |                         | Overall | 225.74  | 117.54 | 315.49          | 263.62          | 212.32          | 144.91          | 114.27          |        |
| 40-49                     |                         | Male    | 197.38  | 70.17  | 305.64          | 235.61          | 172.20          | 153.40          | 124.10          |        |
|                           |                         | Female  | 262.68  | 114.01 | 445.05          | 360.43          | 222.13          | 190.72          | 133.58          |        |
|                           |                         | Overall | 230.03  | 99.29  | 391.42          | 270.33          | 201.86          | 157.00          | 125.75          |        |
| 50-59                     |                         | Male    | 220.41  | 81.35  | 301.16          | 249.72          | 202.29          | 191.27          | 154.05          |        |
|                           |                         | Female  | 301.60  | 106.78 | 449.29          | 385.79          | 289.96          | 205.65          | 183.39          |        |
|                           |                         | Overall | 272.85  | 105.21 | 438.03          | 348.96          | 247.11          | 196.61          | 173.15          |        |
| 60+                       |                         | Male    | 289.84  | 93.21  | 409.11          | 350.25          | 306.53          | 239.59          | 180.02          |        |
|                           |                         | Female  | 305.15  | 111.83 | 441.17          | 348.80          | 287.24          | 230.78          | 175.85          |        |
|                           |                         | Overall | 299.26  | 104.70 | 427.16          | 350.42          | 291.64          | 232.78          | 179.26          |        |
| <b>Pointing</b>           |                         | 21-29   | Male    | 52.95  | 20.80           | 75.54           | 67.07           | 51.76           | 44.49           | 24.66  |
|                           |                         |         | Female  | 57.97  | 21.68           | 78.98           | 72.20           | 57.44           | 41.92           | 35.49  |
|                           |                         |         | Overall | 55.59  | 21.28           | 76.97           | 68.87           | 52.36           | 42.67           | 29.77  |
|                           | 30-39                   | Male    | 60.19   | 20.48  | 81.57           | 72.14           | 65.14           | 50.19           | 30.97           |        |
|                           |                         | Female  | 59.16   | 22.06  | 77.19           | 69.98           | 60.45           | 44.23           | 30.92           |        |
|                           |                         | Overall | 59.62   | 21.23  | 79.29           | 70.30           | 61.96           | 48.51           | 30.92           |        |
|                           | 40-49                   | Male    | 65.67   | 18.49  | 87.22           | 81.66           | 66.03           | 55.89           | 43.00           |        |
|                           |                         | Female  | 68.86   | 18.10  | 96.79           | 78.14           | 69.53           | 58.75           | 50.54           |        |
|                           |                         | Overall | 67.27   | 18.17  | 89.78           | 80.29           | 66.34           | 56.43           | 43.77           |        |
|                           | 50-59                   | Male    | 64.49   | 14.61  | 77.30           | 74.92           | 65.92           | 56.76           | 47.51           |        |
|                           |                         | Female  | 75.82   | 18.05  | 100.82          | 86.39           | 74.02           | 66.34           | 51.24           |        |
|                           |                         | Overall | 71.81   | 17.62  | 94.07           | 79.04           | 72.16           | 61.81           | 51.04           |        |
|                           | 60+                     | Male    | 67.43   | 12.27  | 83.91           | 76.26           | 66.66           | 61.34           | 56.00           |        |
|                           |                         | Female  | 75.29   | 17.28  | 101.21          | 86.55           | 75.71           | 67.02           | 57.91           |        |
|                           |                         | Overall | 72.23   | 15.91  | 96.99           | 82.43           | 73.21           | 64.31           | 56.69           |        |
|                           | <b>Mapping</b>          | 21-29   | Male    | 0.51   | 0.33            | 0.11            | 0.20            | 0.50            | 0.88            | 0.94   |
|                           |                         |         | Female  | 0.57   | 0.30            | 0.16            | 0.26            | 0.59            | 0.87            | 0.96   |
|                           |                         |         | Overall | 0.54   | 0.32            | 0.14            | 0.22            | 0.53            | 0.87            | 0.95   |
| 30-39                     |                         | Male    | 0.49    | 0.33   | 0.10            | 0.20            | 0.49            | 0.83            | 0.95            |        |
|                           |                         | Female  | 0.54    | 0.33   | 0.12            | 0.28            | 0.53            | 0.85            | 0.95            |        |
|                           |                         | Overall | 0.52    | 0.33   | 0.11            | 0.24            | 0.51            | 0.86            | 0.95            |        |
| 40-49                     |                         | Male    | 0.52    | 0.36   | 0.10            | 0.20            | 0.56            | 0.89            | 0.95            |        |
|                           |                         | Female  | 0.46    | 0.31   | 0.12            | 0.17            | 0.40            | 0.62            | 0.92            |        |
|                           |                         | Overall | 0.49    | 0.33   | 0.11            | 0.17            | 0.41            | 0.83            | 0.95            |        |
| 50-59                     |                         | Male    | 0.39    | 0.30   | 0.10            | 0.19            | 0.28            | 0.51            | 0.88            |        |
|                           |                         | Female  | 0.35    | 0.28   | 0.07            | 0.12            | 0.26            | 0.51            | 0.87            |        |
|                           |                         | Overall | 0.36    | 0.29   | 0.08            | 0.13            | 0.28            | 0.51            | 0.88            |        |
| 60+                       |                         | Male    | 0.31    | 0.27   | 0.04            | 0.10            | 0.23            | 0.51            | 0.68            |        |
|                           |                         | Female  | 0.42    | 0.29   | 0.08            | 0.18            | 0.34            | 0.62            | 0.89            |        |
|                           |                         | Overall | 0.37    | 0.28   | 0.06            | 0.15            | 0.29            | 0.56            | 0.82            |        |
| <b>Perspective taking</b> |                         | 21-29   | Male    | 13.30  | 10.26           | 23.91           | 18.92           | 10.41           | 5.85            | 4.54   |
|                           |                         |         | Female  | 24.71  | 17.23           | 43.36           | 30.19           | 20.14           | 11.52           | 8.97   |
|                           |                         |         | Overall | 19.38  | 15.41           | 33.44           | 24.02           | 14.59           | 8.82            | 5.65   |
|                           | 30-39                   | Male    | 23.96   | 21.81  | 51.62           | 35.88           | 12.96           | 8.53            | 5.26            |        |
|                           |                         | Female  | 23.09   | 19.88  | 50.78           | 30.00           | 14.61           | 9.12            | 6.25            |        |
|                           |                         | Overall | 23.48   | 20.62  | 51.36           | 33.76           | 13.60           | 8.70            | 5.56            |        |
|                           | 40-49                   | Male    | 23.89   | 25.98  | 59.91           | 22.72           | 13.05           | 8.90            | 6.45            |        |
|                           |                         | Female  | 30.97   | 23.38  | 53.07           | 37.18           | 23.84           | 15.66           | 7.97            |        |
|                           |                         | Overall | 27.58   | 24.64  | 56.47           | 36.34           | 18.26           | 10.54           | 6.61            |        |
|                           | 50-59                   | Male    | 25.27   | 19.07  | 49.12           | 32.02           | 22.91           | 10.31           | 5.82            |        |
|                           |                         | Female  | 34.84   | 21.57  | 64.41           | 51.59           | 32.36           | 17.42           | 10.37           |        |
|                           |                         | Overall | 31.58   | 21.05  | 61.25           | 47.41           | 25.49           | 14.62           | 7.43            |        |
|                           | 60+                     | Male    | 34.95   | 25.58  | 69.29           | 48.07           | 22.90           | 14.93           | 10.92           |        |
|                           |                         | Female  | 41.81   | 23.95  | 73.83           | 62.08           | 39.26           | 24.94           | 12.87           |        |
|                           |                         | Overall | 39.09   | 24.66  | 73.00           | 60.17           | 33.07           | 19.38           | 11.53           |        |
